# Supplementary material for: Sociodemographic and clinical characteristics of 1,234 individuals diagnosed with trichotillomania in the Swedish National Patient Register
Source: Springer Nature journal article supplement (doi:10.1038/s41598-025-95416-w), 2025-03-26
Supplement: MOESM1 [file 41598_2025_95416_MOESM1_ESM.pdf]

## **SUPPLEMENTARY MATERIAL**

### **Sociodemographic and clinical characteristics of 1,234 individuals diagnosed with trichotillomania in the Swedish National Patient Register**

Luis C. Farhat, Kayoko Isomura, Lorena Fernández de la Cruz, Anna Sidorchuk, Ralf Kuja-  
Halkola, Isabell Brikell, Zheng Chang, Brian M. D’Onofrio, Henrik Larsson, Paul Lichtenstein,  
David Mataix-Cols

**Supplementary Table 1.** Swedish International Classification of Diseases (ICD), 10th edition codes used to identify diagnoses of psychiatric disorder comorbidities in the Swedish National Patient Register.

| <b>Psychiatric disorders</b>                                                                              | <b>Swedish ICD-10 code</b>                           | <b>Minimal age to retrieve records of diagnoses</b> |
|-----------------------------------------------------------------------------------------------------------|------------------------------------------------------|-----------------------------------------------------|
| Attention-deficit/ hyperactivity disorder <sup>a</sup>                                                    | F90                                                  | ≥ 3 years                                           |
| Pervasive developmental disorders                                                                         | F84                                                  | ≥ 1 year                                            |
| Tourette syndrome or chronic tic disorders                                                                | F95 <sup>b</sup>                                     | ≥ 3 years                                           |
| Schizophrenia or other psychotic disorders                                                                | F20, F21, F22, F23, F24, F25 (minus F25.0), F28, F29 | ≥ 10 years                                          |
| Bipolar disorders                                                                                         | F25.0, F30, F31, F34.0                               | ≥ 10 years                                          |
| Depressive disorders (major depressive disorder, persistent mood disorder, and unspecified mood disorder) | F32, F33, F34 (minus F34.0), F38, F39                | ≥ 6 years                                           |
| Phobic and anxiety disorders                                                                              | F40, F41                                             | ≥ 6 years                                           |
| Obsessive-compulsive disorder                                                                             | F42                                                  | ≥ 6 years                                           |
| Reaction to severe stress and adjustment disorders                                                        | F43                                                  | ≥ 6 years                                           |
| Eating disorders                                                                                          | F50.0-F50.3, F50.9                                   | ≥ 8 years                                           |
| Emotionally unstable personality disorder                                                                 | F60.3                                                | ≥16 years                                           |

<sup>a</sup>Individuals with attention-deficit/hyperactivity disorder (ADHD) were also identified by prescription of ADHD drugs, collected from the Prescription Drug Register, specifically amphetamine (Anatomical Therapeutic Chemical [ATC] Classification System code: N06BA01), dexamphetamine (N06BA02), methylphenidate (N06BA04), atomoxetine (N06BA09), and lisdexamphetamine (N06BA12).

<sup>b</sup>Tourette syndrome and chronic tic disorder cases were ascertained as based on the algorithm described in Rück et al. (2015).

**Supplementary Table 2.** Swedish Anatomical Therapeutic Chemical (ATC) Classification System codes used to identify dispensed medications in the Swedish Prescribed Drug Register.

|                                         | <b>ATC codes</b>                                       |
|-----------------------------------------|--------------------------------------------------------|
| <b>ADHD medications</b>                 | N06BA                                                  |
| Methylphenidate                         | N06BA04                                                |
| Other ADHD medications                  | N06BA01, N06BA02, N06BA09, N06BA12                     |
| <b>Antidepressants</b>                  | N06A                                                   |
| SSRIs                                   | N06AB                                                  |
| Clomipramine                            | N06AA04                                                |
| Other antidepressants                   | N06A (excluding N06AA04 and N06AB)                     |
| <b>Anxiolytics</b>                      | N05B                                                   |
| Benzodiazepine-based                    | N05BA                                                  |
| Non-benzodiazepine-based                | N05BB (excluding N06BA)                                |
| <b>Hypnotic/ sedatives</b>              | N05C                                                   |
| Benzodiazepine-based                    | N05CD, N05CF                                           |
| Non-benzodiazepine-based                | N05C (excluding N05CD and N05CF)                       |
| <b>Antipsychotics</b>                   | N05A                                                   |
| Typical antipsychotics                  | N05AA, N05AB, N05AC, N05AD, N05AF, N05AG, N05AK, N05AL |
| Atypical antipsychotics                 | N05AE, N05AH, N05AX                                    |
| <b>Lithium</b>                          | N05AN                                                  |
| <b>Antiepileptics</b>                   | N03A                                                   |
| Lamotrigine                             | N03AX09                                                |
| Valproic acid                           | N03AG01                                                |
| Other antiepileptics                    | N03A (excluding N03AG01 and N03AX09)                   |
| <b>Analgesics</b>                       | N02A, N02BF                                            |
| <b>Antiparkinsonian medications</b>     | N04                                                    |
| <b>Naltrexone</b>                       | N07BB04                                                |
| <b>Analgesics</b>                       | N02                                                    |
| Opioids                                 | N02A                                                   |
| Other analgesics and antipyretics       | N02B                                                   |
| Antimigraine preparations               | N02C                                                   |
| <b>Other nervous system medications</b> | N07 (excluding N07BB04)                                |

*Abbreviations:* ADHD, attention-deficit/hyperactivity disorder; SSRI, selective serotonin reuptake inhibitors.
